# Supplementary material for: Herbal Medicines for Long COVID: A Phase 2 Pilot Clinical Study
Source: Preprints.org preprint supplement (doi:10.20944/preprints202401.1605.v1), 2024-01-23
Supplement: Supplementary file 1 [file supplementary]

**Supplementary Table S1.** Inclusion and exclusion criteria for the herbal medicine-long covid trial

| Inclusion criteria | Exclusion criteria |
| --- | --- |
| *•* Those aged >19 years and have been diagnosed with COVID-19 and recovered. To confirm the COVID-19 diagnosis and recovery, medical history will be examined by reviewing the submitted medical records about the diagnosis, hospitalization, and certificate of SARS-CoV-2 negative or conduct COVID-19 antibody test using the COVID-19 IgM/IgG Plus Test kit (Sugentech, Inc., Daejeon, Korea) approved by the Korean Ministry of Food and Drug Safety. If submission of medical records is possible, the antibody test can be skipped. *•* Those who are continuously complaining of fatigue or cognitive dysfunction for >4 weeks that they did not experience before their COVID-19 diagnosis. *•* Those who scored a total of >76 points on the Checklist Individual Strength (CIS). *•* Participants do not have any problems with overall cognitive function and must be capable of providing written informed consent to participate in the study. | *•* Those who have been diagnosed with diseases that can cause fatigue (cancer, sleep disturbance, chronic hepatitis, liver cirrhosis, chronic renal failure, tuberculosis, asthma, multiple sclerosis). *•* Those who have been diagnosed with diseases that can cause “brain fog” (cerebral hemorrhage, cerebral infarction, brain tumor, Parkinson’s disease, epilepsy, major depressive disorder, bipolar affective disorder, schizophrenia, delusional disorder, or dementia). *•* Those who have medical problems that may affect the intake or absorption of drugs (dysphagia, clinically serious digestive disorders, galactose intolerance, Lapp lactase deficiency, or glucose-galactose malabsorption). *•* Those currently with or have a medical history of allergy to clinical trial drugs (herbal medicines). *•* Those who have been diagnosed with liver or kidney disease, or have abnormal levels in blood tests (exceed 3 times the upper limit of normal aspartate aminotransferase (AST), alanine aminotransferase (ALT), blood urine nitrogen (BUN), or creatinine level). *•* Pregnant, lactating, and fertile women who have a pregnancy plan. *•* Those who have participated in other clinical trials within 30 days of participating in this study. *•* Those who are judged to be inappropriate for the clinical trial by the researchers due to clinically significant psychiatric symptoms, physical conditions, laboratory findings or other medical states. |
